# Supplementary material for: On the use of Schwarz–Christoffel conformal mappings to the grid generation for global ocean models
Source: Copernicus journal article supplement (doi:10.5194/gmd-8-3471-2015), 2015-10-29
Supplement: Supplementary file 1 [file gmd-8-3471-2015-supplement.zip]

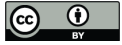

## *Supplement of*

# **On the use of Schwarz–Christoffel conformal mappings to the grid generation for global ocean models**

**S. Xu et al.**

*Correspondence to:* S. Xu (xusm@tsinghua.edu.cn)

- gmd-8-3471-2015-supplement-title-page.pdf
- \_\_MACOSX
  - .\_global.MX05.grid
  - .\_global.MX05.kmt
  - .\_global.SX1.grid
  - .\_global.SX1.kmt
  - .\_in\_depth.dat
  - .\_supplementary\_files.pdf
- global.MX05.grid
- global.MX05.kmt
- global.SX1.grid
- global.SX1.kmt
- in\_depth.dat
- supplementary\_files.pdf

The copyright of individual parts of the supplement might differ from the CC-BY 3.0 licence.
