# Supplementary material for: On the use of Schwarz–Christoffel conformal mappings to the grid generation for global ocean models
Source: Copernicus journal article supplement (doi:10.5194/gmd-8-3471-2015), 2015-10-29
Supplement: Supplementary file 3 [file gmd-8-3471-2015-supplement.zip]

Supplementary file list:

File: global.SX1.grid

POP model grid input file for sample grid generated with SCSC mapping, with nominal resolution of 1 degree, and dimensions of 360 by 306.

File: global.SX1.kmt

POP model bathymetry file for sample grid generated with SCSC mapping. To be used with global.SX1.grid.

File: global.MX05.grid

POP model grid input file for sample grid generated with MCSC mapping, with nominal resolution of 0.5 degree, and dimensions of 720 by 330.

File: global.MX05.kmt

POP model bathymetry file for sample grid generated with MCSC mapping. To be used with global.MX05.grid.

File: in\_depth.dat

POP model input file for Z-levels. It contains 46 vertical layers, and the maximum depth is 6000m.
